# Supplementary material for: Construction of Y-CuMoO 4 heterojunction nanocomposites for toxic methylene blue dye removal and electrocatalytic sensing of 3-chlorophenol
Source: Royal Society of Chemistry journal article supplement (doi:10.1039/d5ay01483b), 2025-11-26
Supplement: d5ay01483b1.pdf [file d5ay01483b1.pdf]

## SUPPORTING INFORMATION

### Construction of Y-CuMoO<sub>4</sub> Heterojunction Nanocomposites for toxic Methylene Blue dye removal and electrocatalytic sensing of 3-Chlorophenol.

Vinay G<sup>a</sup>, Ashwini G R<sup>a</sup>, Shivaraj Y<sup>a\*</sup>

<sup>a</sup>Department of Chemistry, Bangalore University, Jnanabharathi Campus, Bengaluru-560 056, Karnataka, India.

#### FT-IR spectral studies of Nanohybrid material:

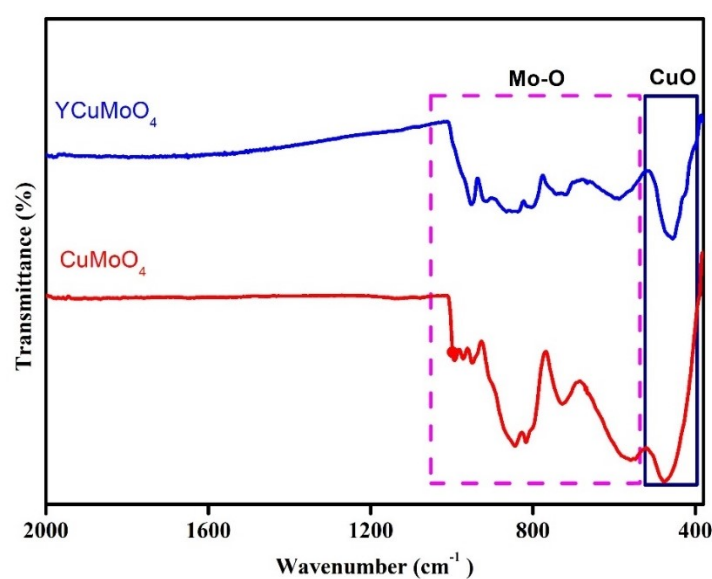

**Fig. S1** FTIR spectra of CuMoO<sub>4</sub> and Y-CuMoO<sub>4</sub>.

#### UV-Visible spectra:

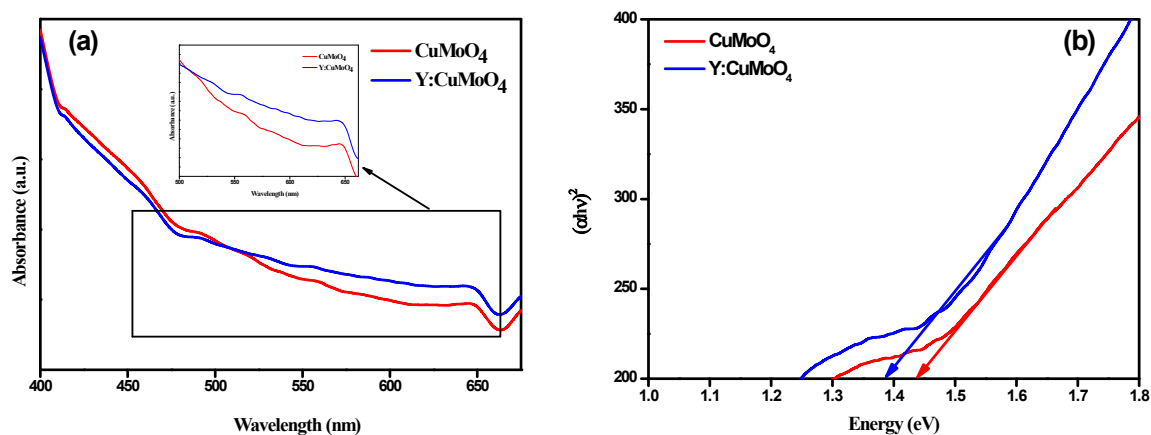

**Fig. S2** (a) UV-Vis spectra and (b) Tauc plots for CuMoO<sub>4</sub> and Y-CuMoO<sub>4</sub>.

## BET analysis:

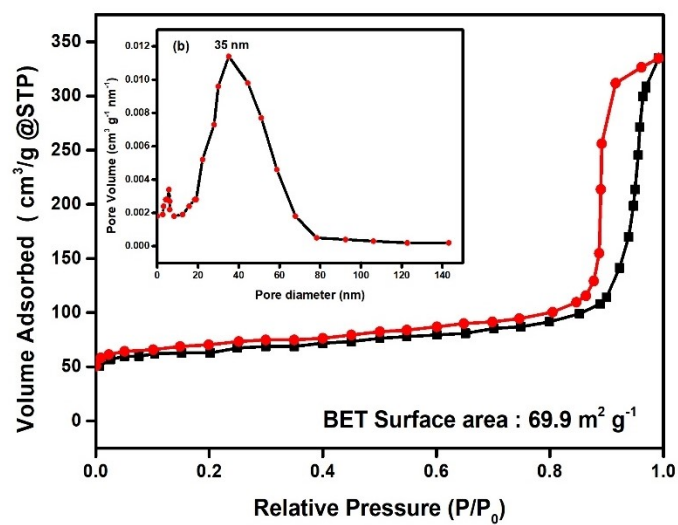

**Fig. S3** BET plot of Y-CuMoO<sub>4</sub> (a), and the inserted one is the pore size distribution (b).

## Influence of pH value and stability analysis.

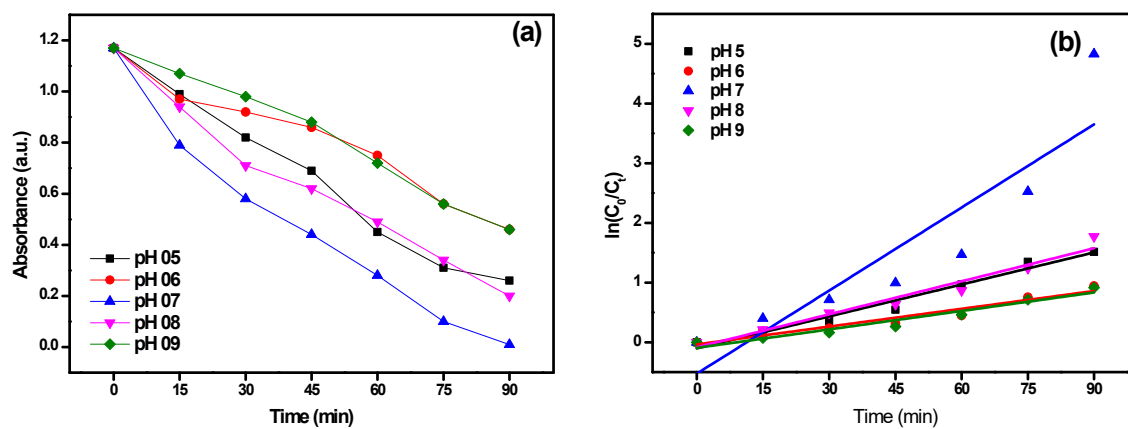

**Fig. S4** (a) The effect of pH on dye degradation and (b) its corresponding rate constant.

### Stability and reproducibility.

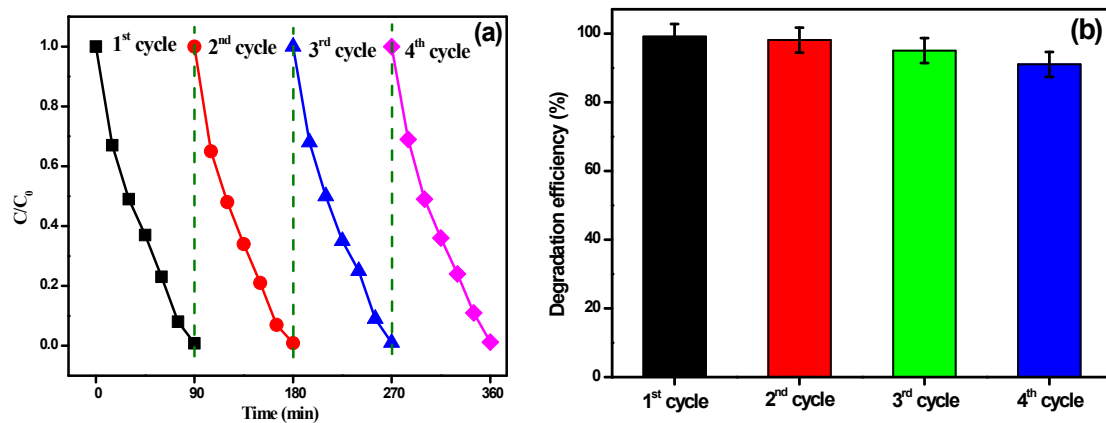

**Fig. S5** a) 4-cycle stability test of Y-CuMoO<sub>4</sub> composite, (b) % of MB degradation efficiency with respect to number of cycles.

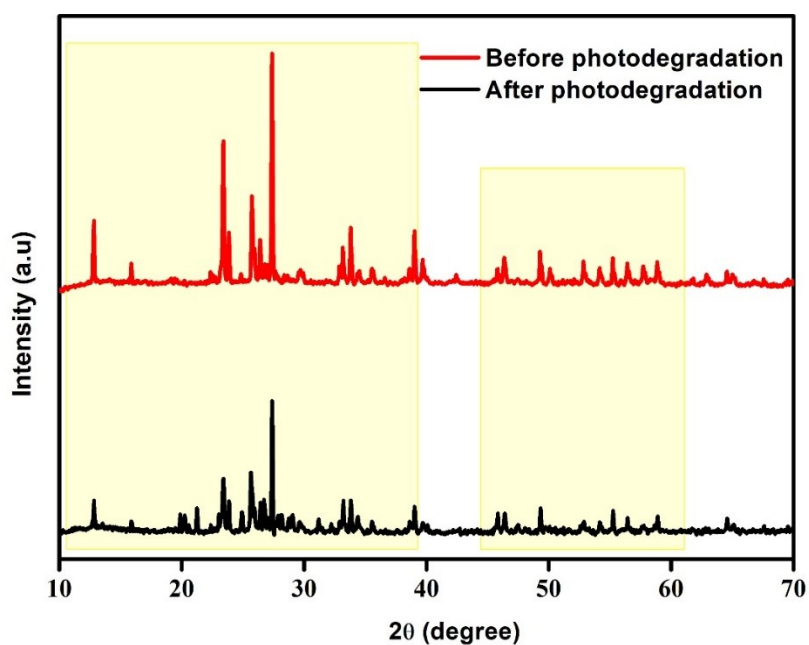

**Fig. S6** XRD spectra of Y-CuMoO<sub>4</sub> nanomaterials before and after photodegradation.

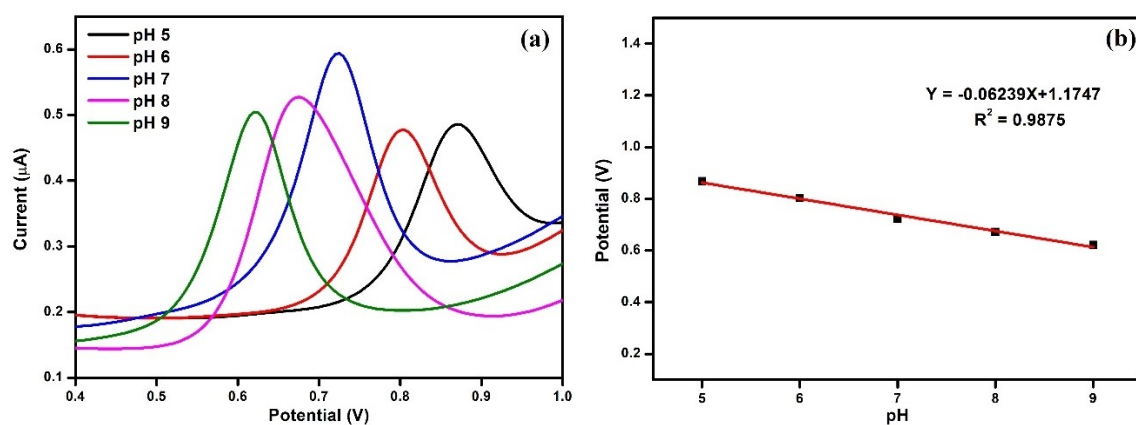

**Fig. S7** (a) DPVs of 1 mM 3CP, in PBS buffer of different pH range from 5 to 9 on Y-CuMoO<sub>4</sub> modified GCE at the scan rate of 50 mVs<sup>-1</sup>. (b) Oxidation potential values of 1 mM 3-CP as a function of pH.

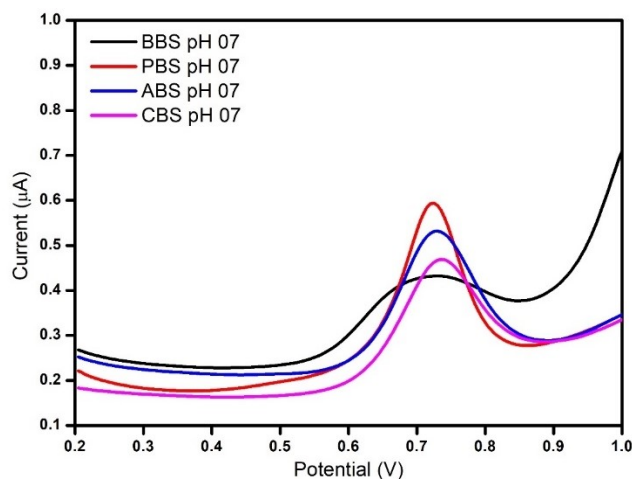

**Fig. S8** DPVs of 0.1 mM 3-CP at various buffers like PBS, ABS, BBS and CBS on Y-CuMoO<sub>4</sub> NPs modified GCE at the scan rate of 50 mVs<sup>-1</sup>.

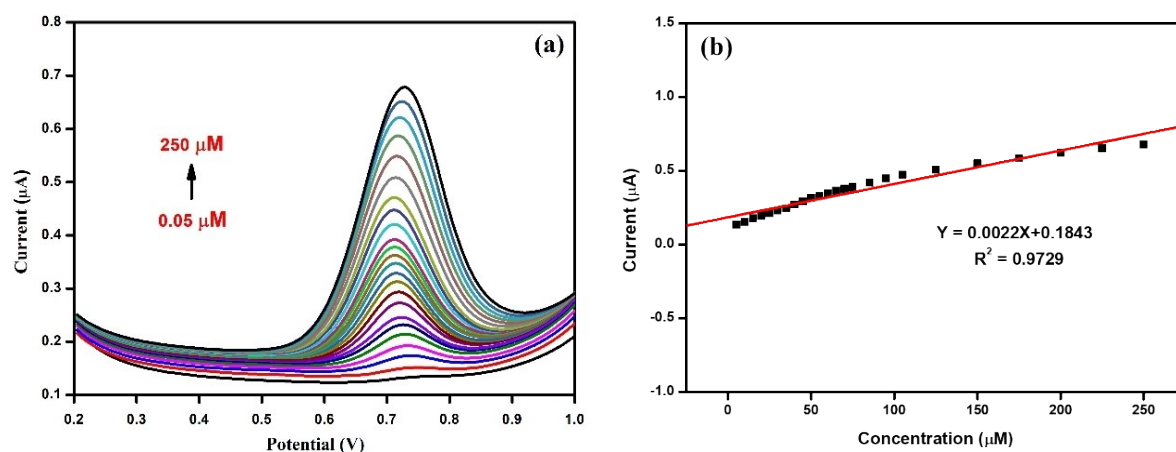

**Fig. S9** (a) DPVs of the Y-CuMoO<sub>4</sub>/GCE in 0.1 M PBS (pH 7) containing different concentrations of 3-CP (0.05 μM – 250 μM), and (b) corresponding calibration plot of current vs. concentration.

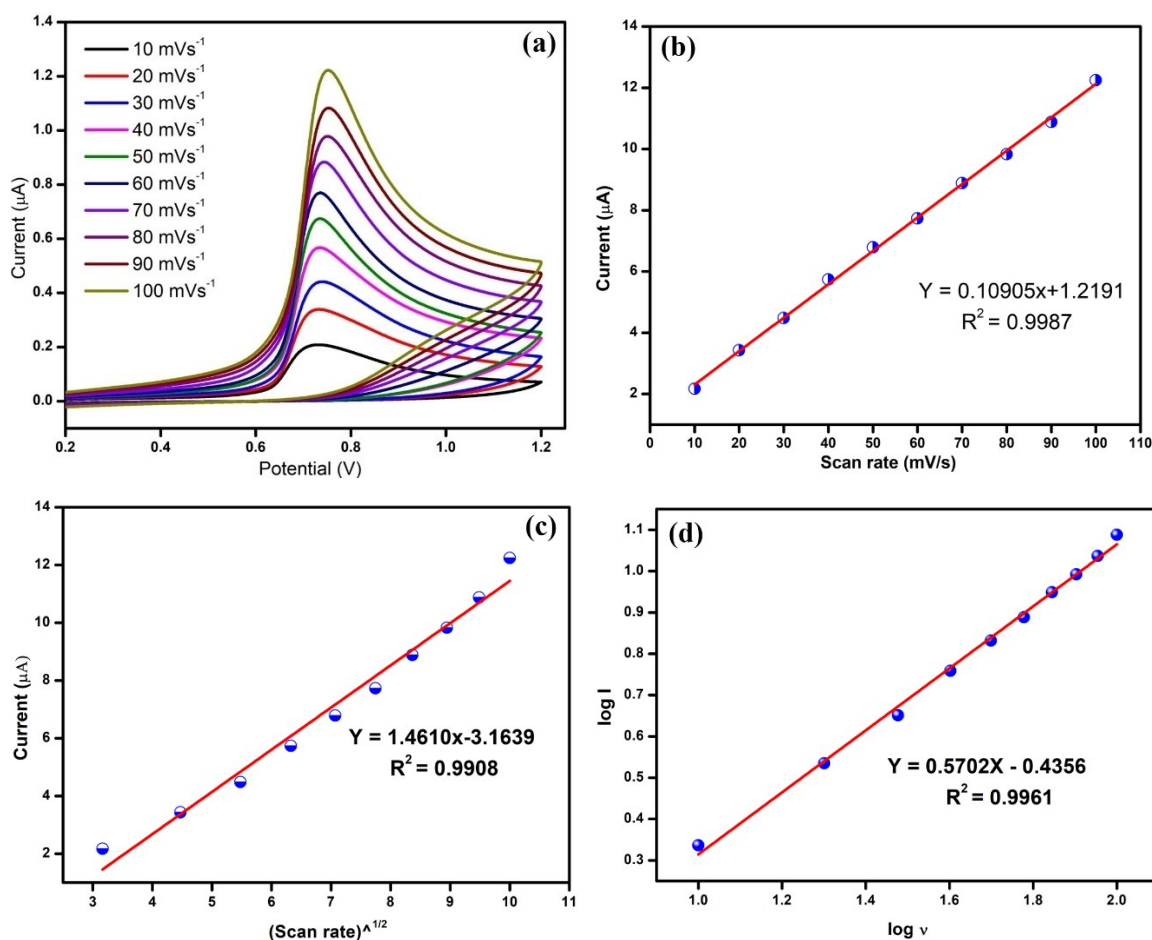

**Fig. S10** (a) CVs of 1 mM 3-CP in 0.1M PBS pH7 at Y-CuMoO<sub>4</sub>NPs/GCE at various scan rates from 10 to 100 mV/s, Calibration plot of peak current vs. scan rate (b), peak current vs. square root of scan rate (c), and log I vs. log v (d).

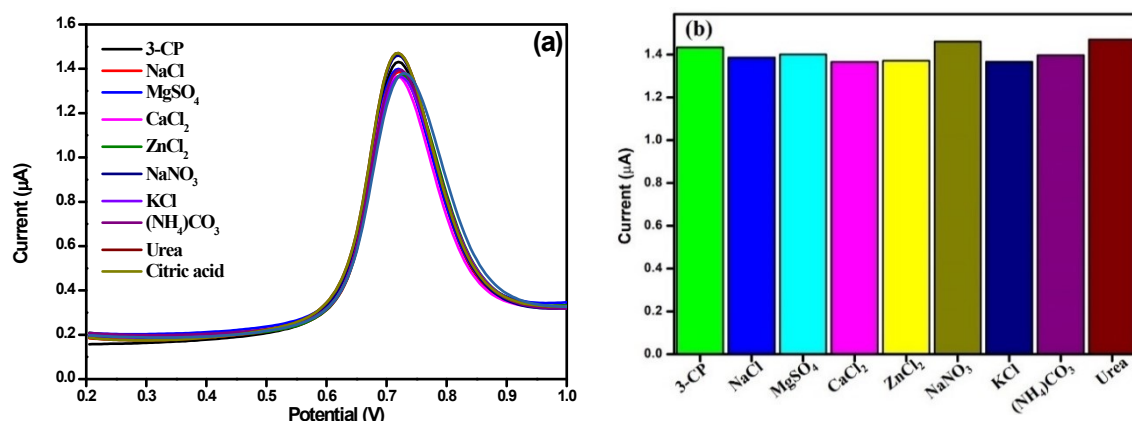

**Fig. S11** (a) DPV response of 0.1 mM 3-CP in the presence of various common interfering species (from NaCl to citric acid) at Y-CuMoO<sub>4</sub>/GCE, and (b) corresponding current vs. interfering species.

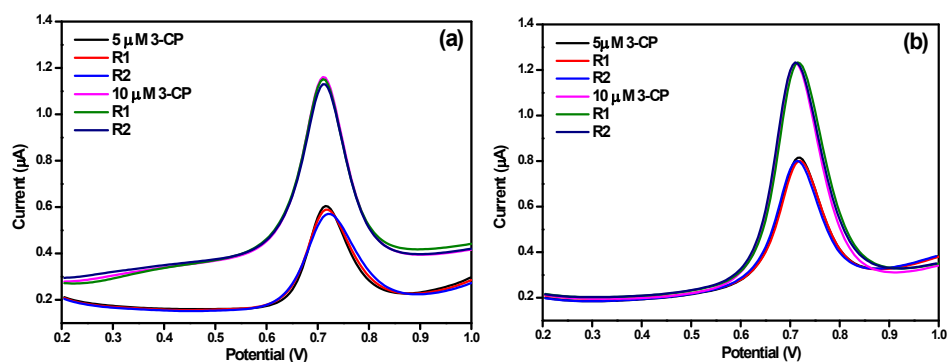

**Fig.S12** (a) DPV's for real sample analysis of 3-CP (a) Tap water, and (b) Deionised water.
